# Supplementary material for: Defect-rich N doped porous carbon derived from Camellia shells for chlorobenzene adsorption
Source: Royal Society of Chemistry journal article supplement (doi:10.1039/d4nj01329h), 2024-01-01
Supplement: d4nj01329h1.pdf [file d4nj01329h1.pdf]

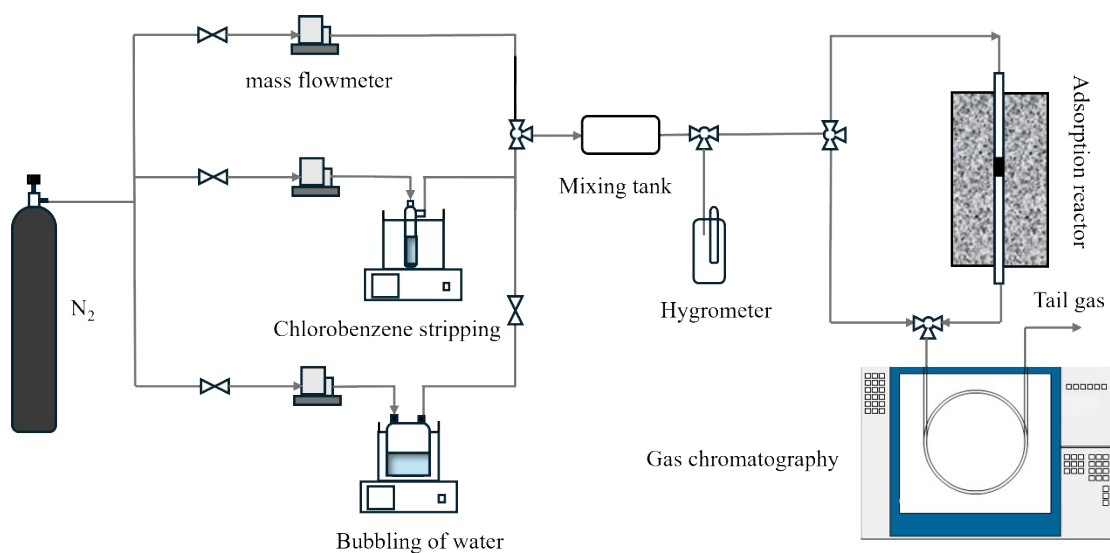

Figure S1 Schematic diagram of dynamic adsorption device for chlorobenzene

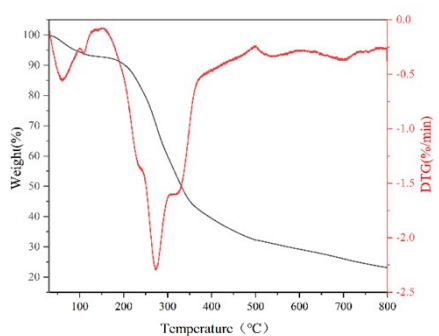

Figure S2 TGA curve of biomass raw materials

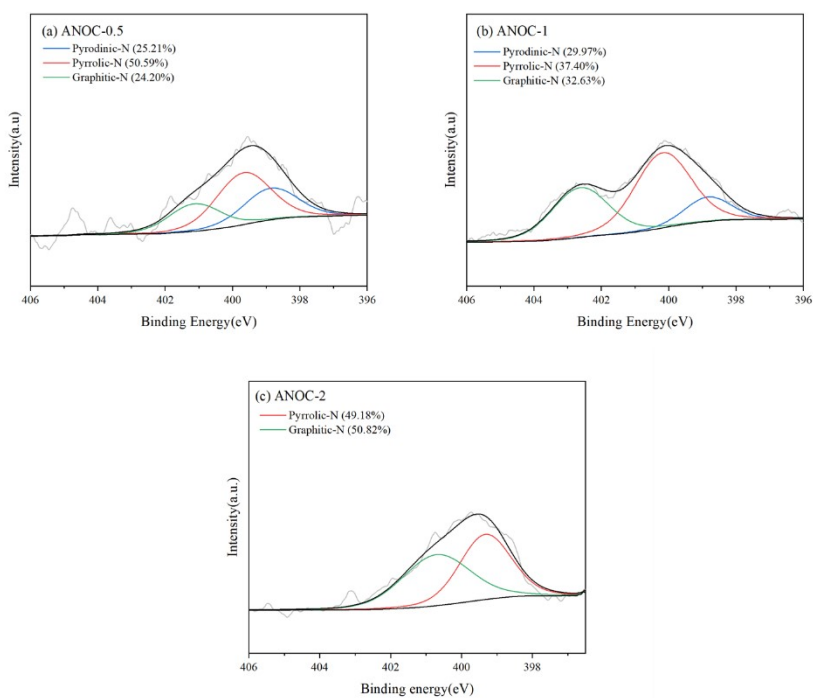

Figure S3 XPS N1s spectra of nitrogen-doped porous carbon

Table S1 Surface nitrogen-containing functional group content of ANOC<sub>x</sub> and AOC

| sample   | XPS (at%) |       |       |       |
|----------|-----------|-------|-------|-------|
|          | N         | N-6   | N-5   | N-Q   |
| NAOC-0.5 | 0.69      | 0.174 | 0.349 | 0.167 |
| NAOC-1   | 0.81      | 0.243 | 0.303 | 0.264 |
| NAOC-1.5 | 1.01      | -     | 0.615 | 0.455 |
| NAOC-2   | 0.88      | -     | 0.433 | 0.447 |
| AOC      | 0.52      | 0.205 | 0.258 | 0.057 |

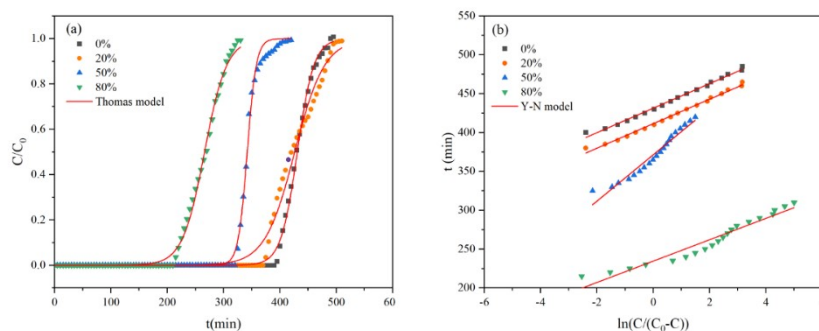

Figure S3 Dynamic adsorption curves and kinetic fitting of chlorobenzene under different humidity conditions for ANOC-1.5

Table S2 Results of chlorobenzene dynamic adsorption of ANOC-1.5 under different humidity conditions

| RH    | $t_{0.05}$ (min) | $Q_{0.05}$ (mg/g) | $t_{0.5}$ (min) | $t$ (min) | $Q$ (mg/g) |
|-------|------------------|-------------------|-----------------|-----------|------------|
| 0%RH  | 400              | 1086.51           | 435             | 500       | 1187.19    |
| 20%RH | 375              | 1018.47           | 420             | 510       | 1161.97    |
| 50%RH | 320              | 869.30            | 340             | 420       | 936.59     |
| 80%RH | 215              | 583.82            | 270             | 330       | 722.30     |

Notes : 0%RH, 20%RH, 50%RH and 80%RH represent humidity conditions of 0%, 20%, 50% and 80% relative humidity, respectively.
